# Supplementary material
Source: HighWire-hosted journal article supplement (https://bmjopen.bmj.com/content/9/8/e028448)
Supplement: inline-supplementary-material-1 [file inline-supplementary-material-1.pdf]

## Supplementary

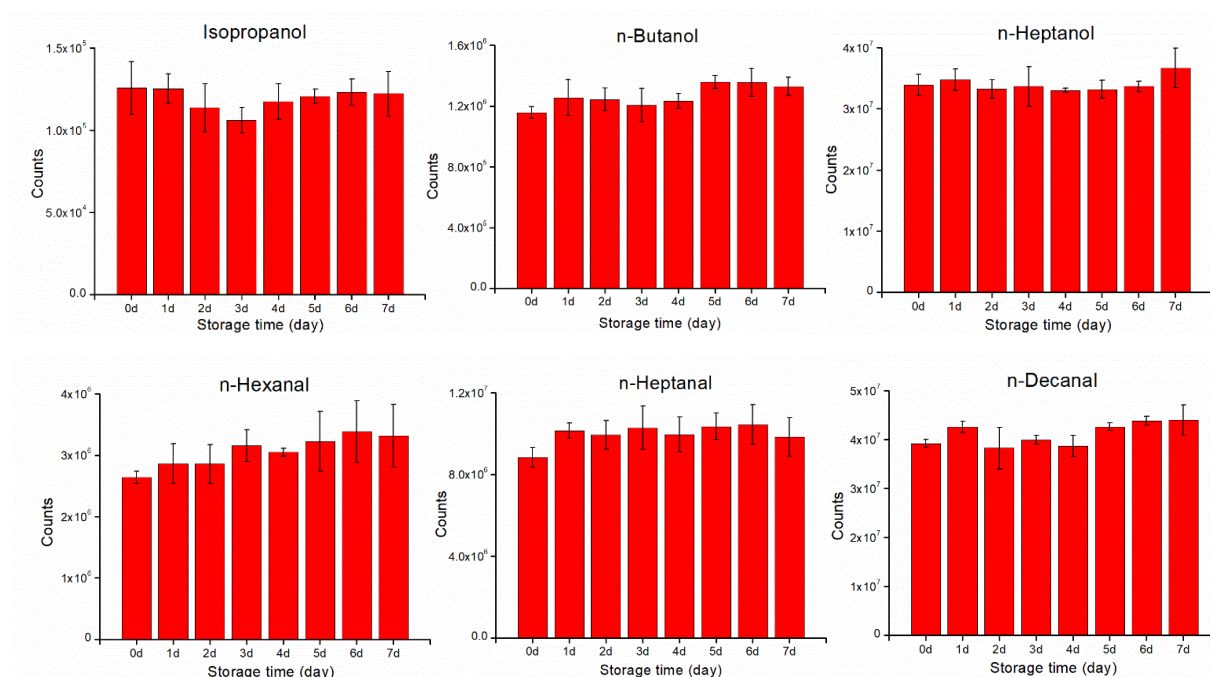

**Figure 1.** Concentrations of isopropanol, n-butanol, n-heptanol, n-hexanal, n-heptanal, and n-decanal (100 ppbv for each compound) in Tedlar bags at -40 °C are nearly constant within seven days, indicating a good storage stability.

**Table1. Requirements for researchers during breath sampling**

| <b>Requirements</b>                                                                                                          | <b>Aims</b>                                                                                                         |
|------------------------------------------------------------------------------------------------------------------------------|---------------------------------------------------------------------------------------------------------------------|
| Pump out air from Tedlar bag fully                                                                                           | Prevent ambient air contamination                                                                                   |
| Ensure Tedlar bag is tightly sealed                                                                                          | Prevent ambient air contamination                                                                                   |
| Connect mouthpiece to Bio-VOC sampler tightly                                                                                | Avoid exhaled gas leakage during expiration                                                                         |
| Rotate the three-way valve to an accurate angle                                                                              | Avoid dead space gas entering the Tedlar bag                                                                        |
| Explain to subjects clearly:<br>Do not take a deep breath;<br>Nasal ventilation is not allowed;<br>Blow slowly and entirely. | Guarantee the collection of late expiratory breath;<br>Avoid dead space air contamination.                          |
| Adjust the Bio-VOC plunger and the three-way valve immediately                                                               | Avoid ambient air entering the Bio-VOC syringe;<br>Avoid sample leakage during transfer from Bio-VOC to Tedlar bag. |
| Close the intake valve of Tedlar bag quickly and tightly                                                                     | Avoid exhaled gas leakage;<br>Prevent ambient air contamination.                                                    |
| Place breath sample in a cold container (2-8 °C)                                                                             | Avoid squeezing of sample bags;<br>Avoid volatilization of exhaled gas.                                             |
| Clean the Bio-VOC syringe with dry dust-free cloth before the next use                                                       | Prevent cross-contamination                                                                                         |
